# Supplementary material for: Identification and Functional Validation of Two Novel Antioxidant Peptides in Saffron
Source: MDPI journal article supplement (doi:10.3390/antiox13030378), 2024-03-20
Supplement: s1 [file s1]

Sample Name :DK  
Sample ID :C982M029G0-1  
Time Processed :23:22:12  
Month-Day-Year Processed :04/30/2023

Pump A : 0.065% trifluoroacetic in 100% water (v/v)  
Pump B : 0.05% trifluoroacetic in 100% acetonitrile (v/v)  
Total Flow:1 ml/min  
Wavelength:220 nm

<<LC Time Program>>

| Time  | Module     | Command | Value |
|-------|------------|---------|-------|
| 0.01  | Pumps      | B.Conc  | 5     |
| 25.00 | Pumps      | B.Conc  | 65    |
| 25.01 | Pumps      | B.Conc  | 95    |
| 27.00 | Pumps      | B.Conc  | 95    |
| 27.01 | Pumps      | B.Conc  | 5     |
| 35.00 | Pumps      | B.Conc  | 5     |
| 35.01 | Controller | Stop    |       |

<<Column Performance>>

<Detector A>

Column :Inertsil ODS-SP 4.6 x 250 mm

Equipment: GK11010011

### <Chromatogram>

mV

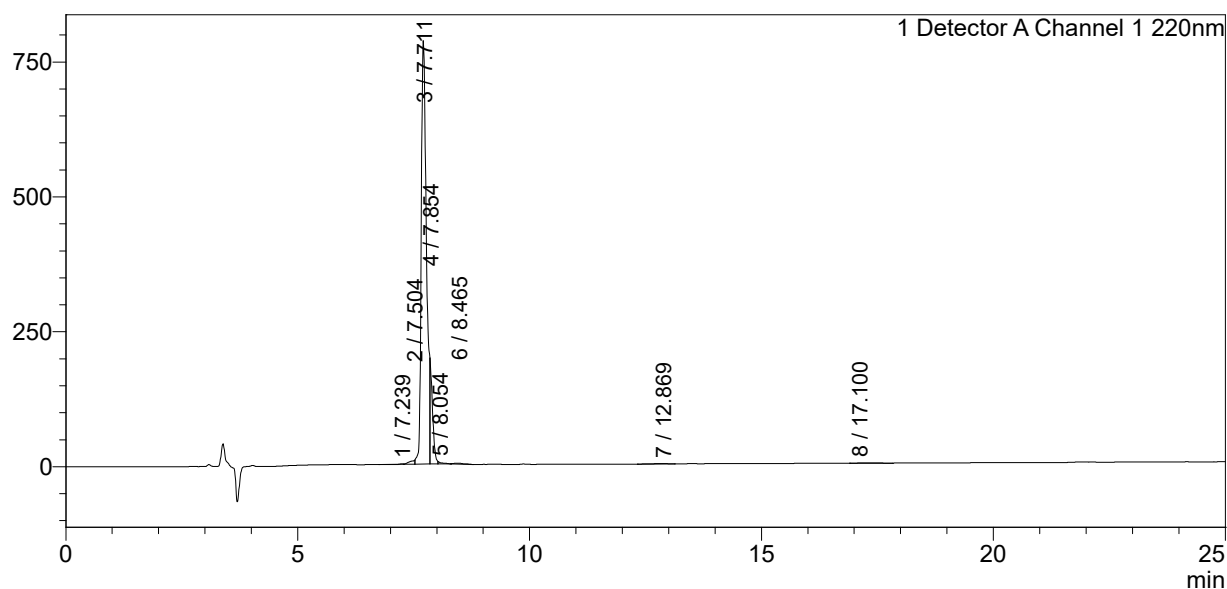

### <Peak Table>

Detector A Channel 1 220nm

| Peak# | Ret. Time | Area    | Height | Area%   |
|-------|-----------|---------|--------|---------|
| 1     | 7.239     | 178     | 835    | 0.003   |
| 2     | 7.504     | 58750   | 6150   | 0.841   |
| 3     | 7.711     | 6154295 | 769018 | 88.109  |
| 4     | 7.854     | 706665  | 203260 | 10.117  |
| 5     | 8.054     | 20467   | 3437   | 0.293   |
| 6     | 8.465     | 19972   | 1495   | 0.286   |
| 7     | 12.869    | 14258   | 719    | 0.204   |
| 8     | 17.100    | 10253   | 335    | 0.147   |
| Total |           | 6984838 | 985248 | 100.000 |
