# Supplementary material for: Identification and Functional Validation of Two Novel Antioxidant Peptides in Saffron
Source: MDPI journal article supplement (doi:10.3390/antiox13030378), 2024-03-20
Supplement: s1 [file s1]

Mass Spectrum

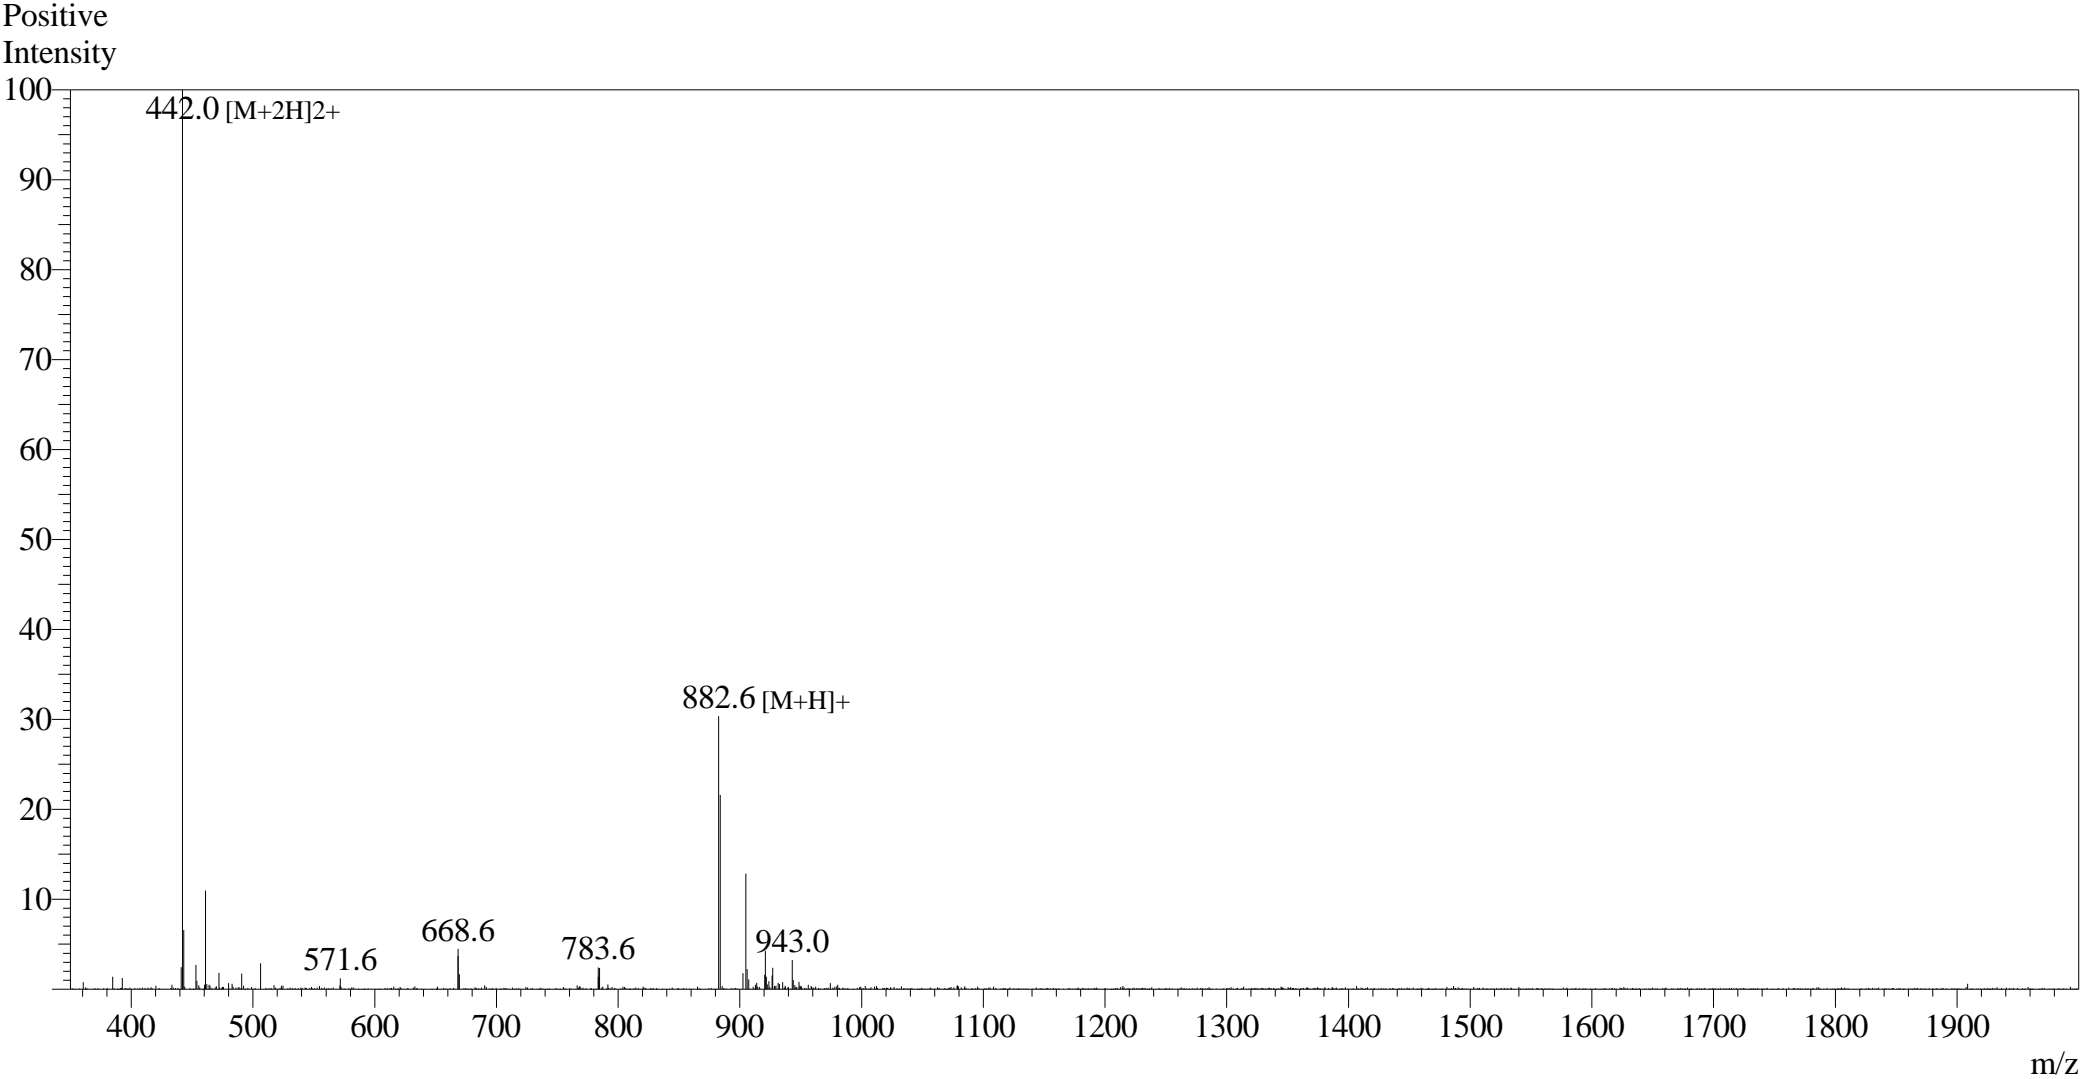

|                       |              |                     |           |                 |                   |
|-----------------------|--------------|---------------------|-----------|-----------------|-------------------|
| Sample Information    |              | Interface           | :ESI      | Equipment       | :ZJ22010150       |
| Month-Day Processed : | 05/02/23     | Nebulizing Gas Flow | :1.5L/min | Interface Bias  | : +4.5 kV         |
| Time Processed :      | 19:02:41     | CDL Temp            | :250      | Drying Gas Flow | :5 L/min          |
| Injection Volume :    | 0.1          | Block Temp          | :200      | T.Flow          | :0.2 ml/min       |
| Sample Name :         | VK           |                     |           | B.conc          | :50% H2O/50% MeOH |
| Sample ID :           | C982M029G0-3 |                     |           |                 |                   |
| Theoretical MW :      | 881.98       |                     |           |                 |                   |
| Observed MW :         | 882.0        |                     |           |                 |                   |
