# Supplementary material for: Identification and Functional Validation of Two Novel Antioxidant Peptides in Saffron
Source: MDPI journal article supplement (doi:10.3390/antiox13030378), 2024-03-20
Supplement: s1 [file s1]

Sample Name :VK  
Sample ID :C982M029G0-3  
Time Processed :20:24:06  
Month-Day-Year Processed :05/02/2023

Pump A : 0.065% trifluoroacetic in 100% water (v/v)  
Pump B : 0.05% trifluoroacetic in 100% acetonitrile (v/v)  
Total Flow:1 ml/min  
Wavelength:220 nm

<<LC Time Program>>

| Time  | Module     | Command | Value |
|-------|------------|---------|-------|
| 0.01  | Pumps      | B.Conc  | 5     |
| 25.00 | Pumps      | B.Conc  | 65    |
| 25.01 | Pumps      | B.Conc  | 95    |
| 27.00 | Pumps      | B.Conc  | 95    |
| 27.01 | Pumps      | B.Conc  | 5     |
| 35.00 | Pumps      | B.Conc  | 5     |
| 35.01 | Controller | Stop    |       |

<<Column Performance>>

<Detector A>

Column :Inertsil ODS-SP 4.6 x 250 mm

Equipment: ZJ20010140

### <Chromatogram>

mV

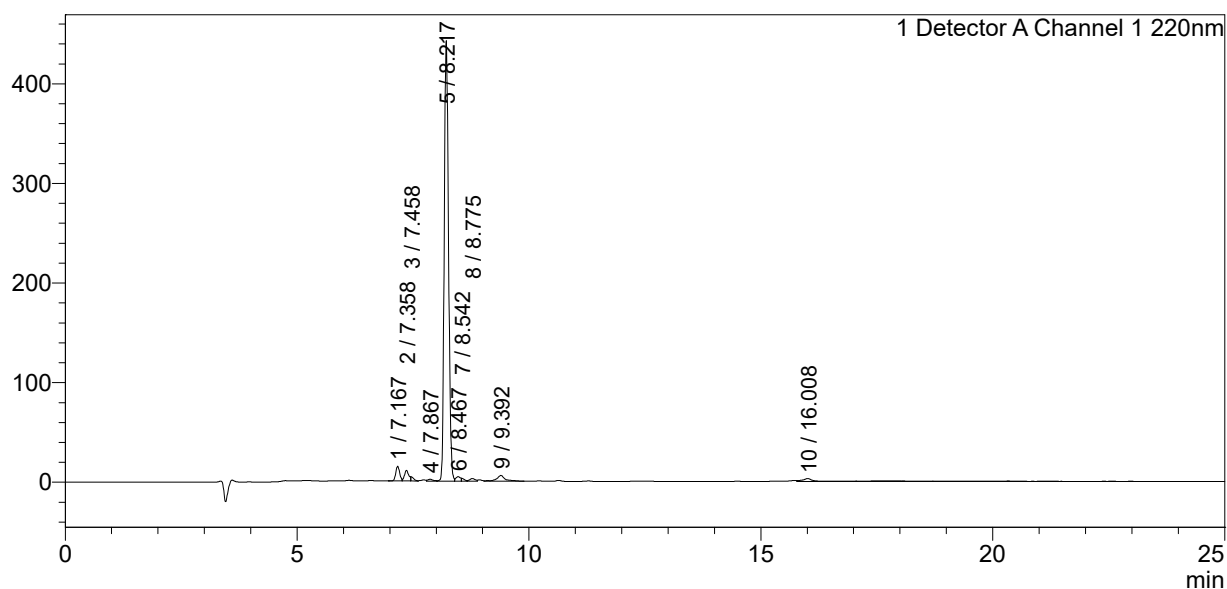

### <Peak Table>

Detector A Channel 1 220nm

| Peak# | Ret. Time | Area    | Height | Area%   |
|-------|-----------|---------|--------|---------|
| 1     | 7.167     | 87268   | 14754  | 2.605   |
| 2     | 7.358     | 69273   | 10667  | 2.068   |
| 3     | 7.458     | 18562   | 4181   | 0.554   |
| 4     | 7.867     | 14151   | 1873   | 0.422   |
| 5     | 8.217     | 2843158 | 442271 | 84.858  |
| 6     | 8.467     | 30297   | 4481   | 0.904   |
| 7     | 8.542     | 12620   | 2968   | 0.377   |
| 8     | 8.775     | 21609   | 2659   | 0.645   |
| 9     | 9.392     | 77937   | 5865   | 2.326   |
| 10    | 16.008    | 175628  | 3057   | 5.242   |
| Total |           | 3350504 | 492774 | 100.000 |
