# Supplementary material for: Identification and Functional Validation of Two Novel Antioxidant Peptides in Saffron
Source: MDPI journal article supplement (doi:10.3390/antiox13030378), 2024-03-20
Supplement: s1 [file s1]

Mass Spectrum

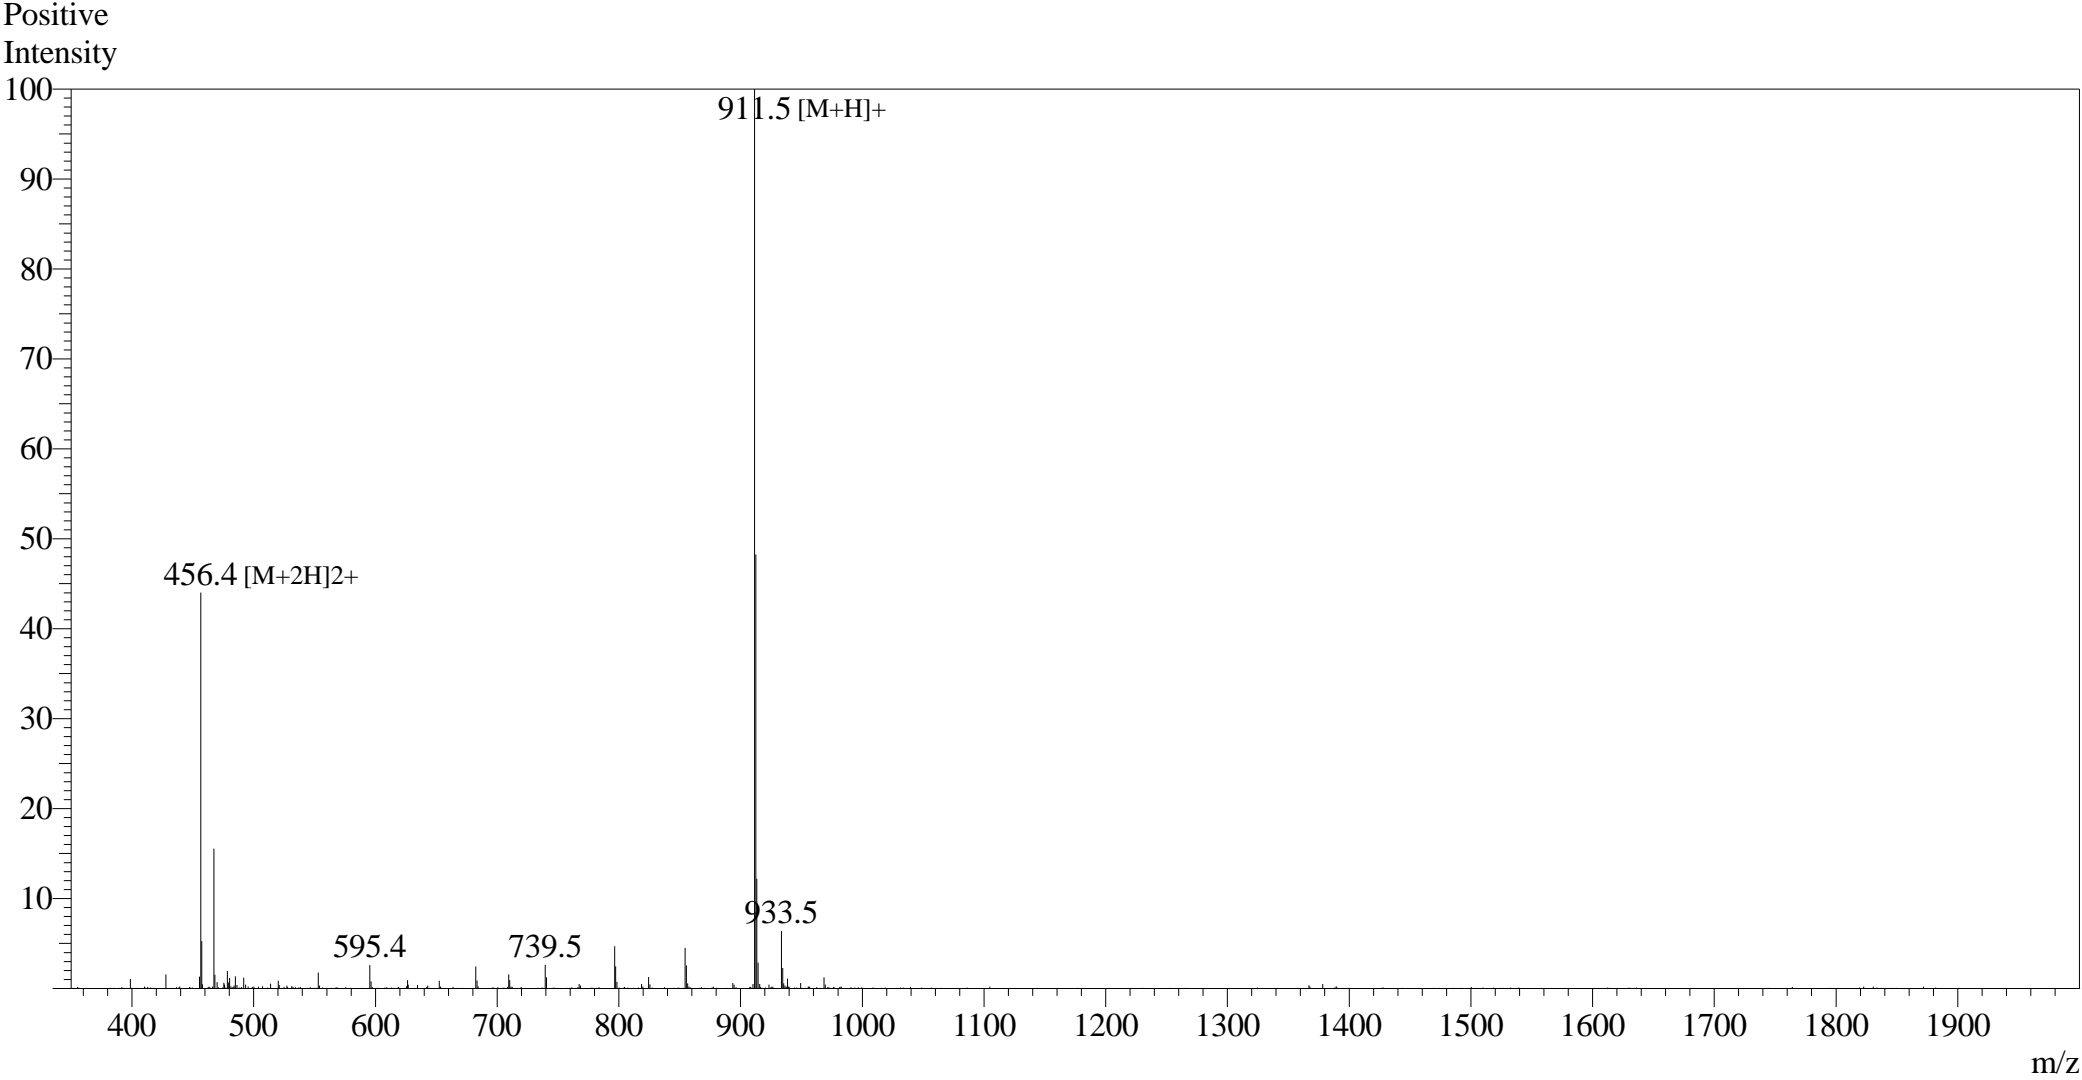

Sample Information  
Month-Day Processed : 04/30/23  
Time Processed : 19:59:45  
Injection Volume : 0.3  
Sample Name : DK  
Sample ID : C982M029G0-1  
Theoretical MW : 910.93  
Observed MW : 910.5

Interface :ESI  
Nebulizing Gas Flow :1.5L/min  
CDL Temp :250  
Block Temp :200

Equipment : ZJ21010035  
Interface Bias : +4.5 kV  
Drying Gas Flow :5 L/min  
T.Flow :0.2 ml/min  
B.conc :50% H2O/50% MeOH
