# Supplementary material for: Identification and Functional Validation of Two Novel Antioxidant Peptides in Saffron
Source: MDPI journal article supplement (doi:10.3390/antiox13030378), 2024-03-20
Supplement: s1 [file s1]

# Identification and Functional Validation of Two Novel Antioxidant Peptides in Saffron

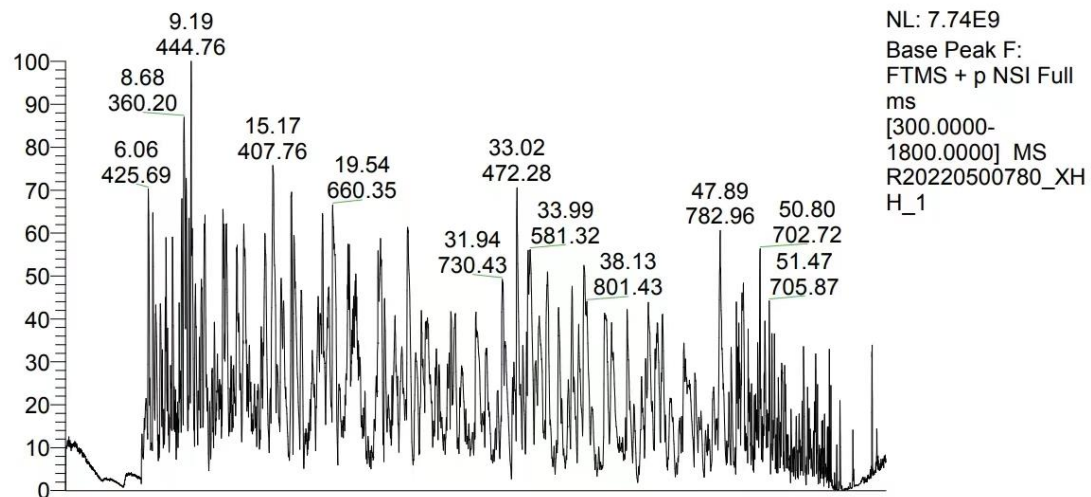

Figure S1. Saffron Protein mass spectrometry

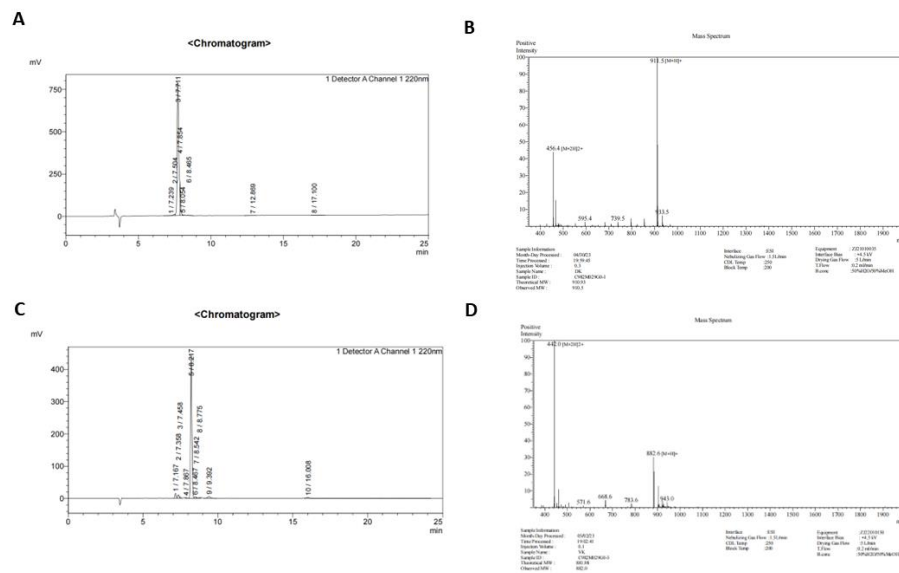

Figure S2. (A-B) Chromatographic diagram (A) and mass-spectrogram (B) of DGGSDYLKGK; (C-D) Chromatographic diagram (C) and mass-spectrogram (D) of VDPYFNK
